# Supplementary material for: Facile fabrication of plasmonic Ag/ZIF-8: an efficient catalyst for investigation of antibacterial, haemolytic and photocatalytic degradation of antibiotics
Source: Royal Society of Chemistry journal article supplement (doi:10.1039/d3ra04851a), 2023-01-01
Supplement: d3ra04851a1.pdf [file d3ra04851a1.pdf]

## Supplementary File

### Facile Fabrication of plasmonic Ag/ZIF-8: an efficient catalyst for investigation of antibacterial, haemolytic and photocatalytic degradation of antibiotics

Asima Subhadarshini <sup>a, c</sup>, Sangram Keshari Samal <sup>b</sup>, Binita Nanda\*<sup>c</sup>

<sup>a</sup> Environmental Science, Department of Chemistry, Faculty of Engineering and Technology (ITER), Siksha 'O' Anusandhan (Deemed to be) University, Bhubaneswar, Odisha, India-751030. <sup>b</sup> Laboratory of Biomaterials and Regenerative Medicines for Advanced Therapies, ICMR- Regional Medical Research Centre, Bhubaneswar, Odisha, India- 751023.

<sup>c</sup> Department of Chemistry, Faculty of Engineering and Technology (ITER), Siksha 'O' Anusandhan (Deemed to be) University, Bhubaneswar, Odisha, India-751 030.

\*Corresponding author: [binitananda@soa.ac.in](mailto:binitananda@soa.ac.in)

#### 1. Zeta Potential Study:

Zeta potential (ZP) measurements were used to verify the stability of particle suspensions of the photocatalysts, as well as their surface charge. To verify the influence of CIP adsorption on the catalysts Table SII shows the respective zeta potential (ZP) results, while Figure SI1 shows the zetapotential curves of the synthesised pristine and doped samples. From the zeta potential value, it is clear that all the samples have positive surface charge and from the pH study it was noted that adsorption of CIP is best in zwitterionic state. Now it is confirmed from the zeta potential value that there is a better electrostatic force of attraction between the substrate and the composite and thereby there is better photocatalytic activity.

**Table SII:** Showing zetapotential charge values of the samples.

| Sl. No. | Samples | Zeta Potential (mV) |
|---------|---------|---------------------|
| 1.      | ZIF-8   | 2.64                |
| 2.      | AZ1     | 0.549               |
| 3.      | AZ2.5   | 0.608               |
| 4.      | AZ5     | 0.462               |

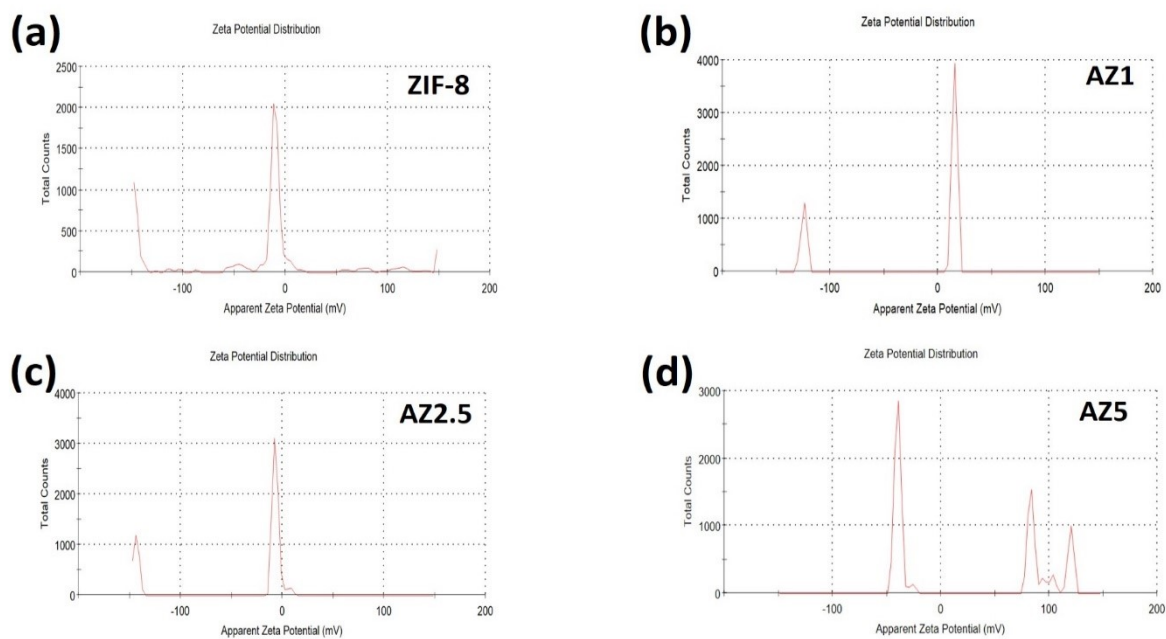

Figure SI1 (a-d): Zetapotential graph of the catalysts.

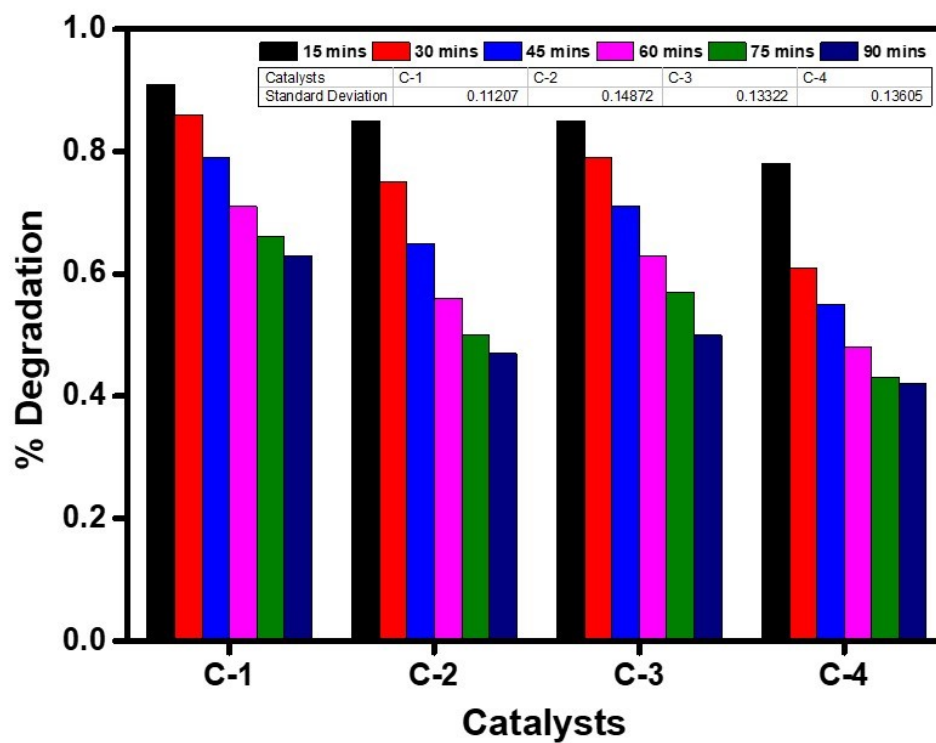

Figure SI2: Error bar graph of photocatalytic experiment with 4 catalysts.
